# Supplementary material
Source: PubMed Central journal article supplement (PMC5647312)

### Electronic Supplementary Material 3

#### Allele frequency calculation

Allele frequency of HLA-A, HLA-B, HLA-C, HLA-DRB1, HLA-DQA1 and HLA-DQB1 based on the EU, German and Bern sample (<http://www.allelefrequencies.net>).

***Filters used:***

***EU population:***

Populations: All Populations / Country: none specified / Source of Dataset: All Sources / Region: Europe / Ethnic Origin: Caucasoid

***German population:***

Populations: All Populations / Country: Germany / Source of Dataset: All Sources / Region: Europe / Ethnic Origin: Caucasoid

***Berne population:***

Populations: All Populations / Country: Switzerland / Source of Dataset: All Sources / Region: Europe / Ethnic Origin: none specified

**Probst, Fischbacher, Lobmaier, Wirthmüller & Knoch: Men's preferences for women's body odours are not associated with HLA**

Typed alleles and their frequencies within the European, German, and Berne population, and frequencies of alleles in the study raters and donors:

| <b>HLA-A</b> |                            |                                  |                               |                      |                      |
|--------------|----------------------------|----------------------------------|-------------------------------|----------------------|----------------------|
| Allele       | EU population<br>N=105'306 | German<br>population<br>N=11'407 | Bern<br>population<br>N=3'545 | Study Raters<br>N=97 | Study donors<br>N=85 |
| 01           | 14.3                       | 15.0                             | 12.8                          | 16.0                 | 11.8                 |
| 02           | 28.5                       | 29.2                             | 27.5                          | 26.8                 | 27.6                 |
| 03           | 14.1                       | 15.5                             | 14.4                          | 13.9                 | 16.5                 |
| 11           | 6.1                        | 5.1                              | 6.2                           | 4.6                  | 7.6                  |
| 23           | 2.3                        | 2.4                              | 2.9                           | 2.6                  | 1.8                  |
| 24           | 10.2                       | 9.5                              | 9.3                           | 17.0                 | 8.8                  |
| 25           | 2.8                        | 2.3                              | 2.2                           | 2.1                  | 2.9                  |
| 26           | 4.1                        | 3.4                              | 4.1                           | 2.1                  | 2.4                  |
| 29           | 2.4                        | 2.7                              | 2.6                           | 1.0                  | 1.2                  |
| 30           | 2.4                        | 2.3                              | 3.6                           | 2.6                  | 3.5                  |
| 31           | 2.4                        | 2.3                              | 3.8                           | 1.5                  | 3.5                  |
| 32           | 3.6                        | 3.8                              | 4.7                           | 3.1                  | 4.1                  |
| 33           | 1.5                        | 1.3                              | 1.3                           | 0.5                  | 1.2                  |
| 68           | 4.1                        | 4.1                              | 4.0                           | 6.2                  | 7.1                  |

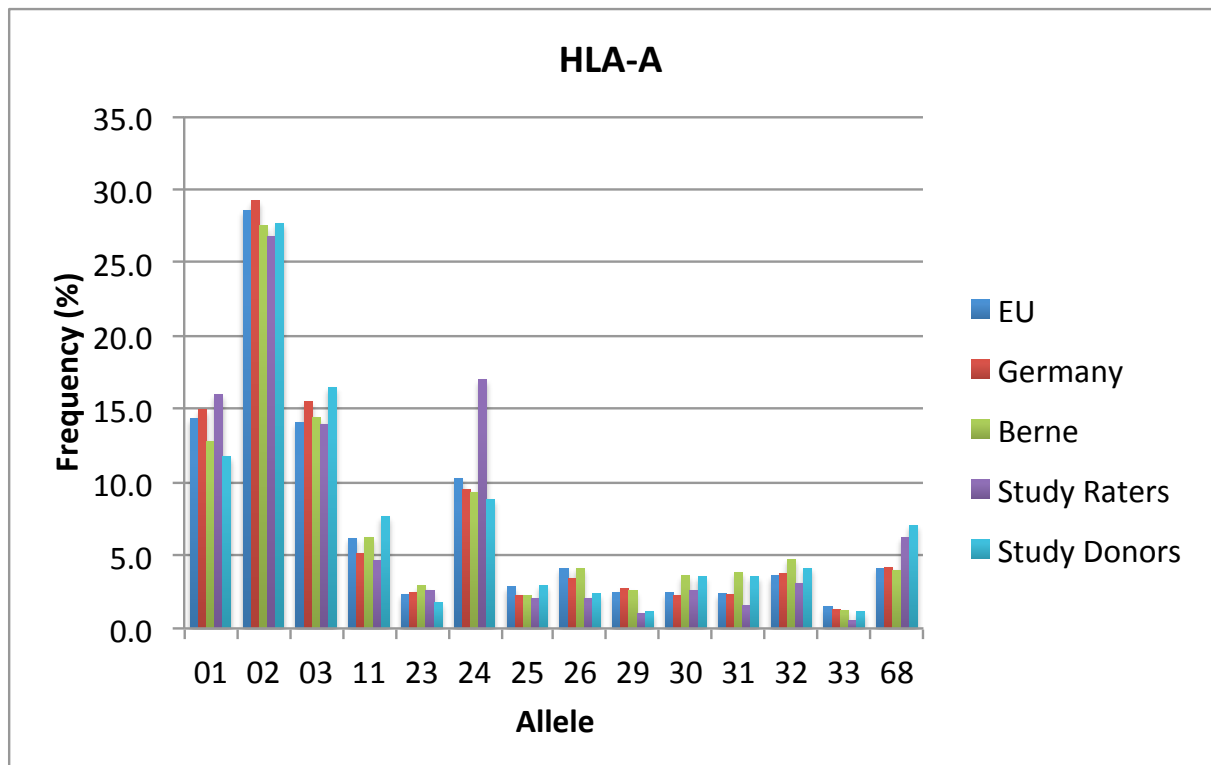

**Probst, Fischbacher, Lobmaier, Wirthmüller & Knoch: Men's preferences for women's body odours are not associated with HLA**

**HLA-B**

| Allele | EU population<br>N=108'441 | German<br>population<br>N=11'407 | Bern<br>population<br>N=3'545 | Study Raters<br>N=97 | Study donors<br>N=85 |
|--------|----------------------------|----------------------------------|-------------------------------|----------------------|----------------------|
| 07     | 11.3                       | 13.1                             | 13.1                          | 13.4                 | 10.6                 |
| 08     | 9.0                        | 10.0                             | 8.1                           | 10.3                 | 9.4                  |
| 13     | 3.9                        | 3.2                              | 3.0                           | 2.6                  | 3.5                  |
| 14     | 2.5                        | 2.5                              | 1.9                           | 2.6                  | 1.8                  |
| 15     | 7.0                        | 8.0                              | 7.7                           | 8.2                  | 5.3                  |
| 18     | 6.0                        | 4.6                              | 5.6                           | 4.6                  | 1.8                  |
| 27     | 4.7                        | 4.3                              | 4.1                           | 2.6                  | 10.0                 |
| 35     | 11.0                       | 9.5                              | 10.4                          | 8.2                  | 11.2                 |
| 37     | 1.3                        | 1.5                              | 1.0                           | 2.1                  | 1.8                  |
| 38     | 2.9                        | 2.2                              | 1.8                           | 1.5                  | 1.8                  |
| 39     | 2.0                        | 2.0                              | 1.5                           | 1.5                  | 1.2                  |
| 40     | 5.8                        | 6.6                              | 6.6                           | 6.2                  | 5.9                  |
| 41     | 1.3                        | 0.9                              | 0.7                           | 0.5                  | 2.4                  |
| 44     | 11.5                       | 12.8                             | 12.9                          | 14.9                 | 11.2                 |
| 45     | 1.7                        | 0.6                              | 0.2                           | 0.0                  | 0.6                  |
| 46     | 1.3                        | 0.1                              | 0.1                           | 0.0                  | 1.2                  |
| 49     | 1.7                        | 1.4                              | 2.1                           | 0.5                  | 2.9                  |
| 50     | 1.3                        | 1.3                              | 1.2                           | 1.0                  | 1.2                  |
| 51     | 7.0                        | 6.2                              | 8.5                           | 9.8                  | 10.6                 |
| 52     | 1.3                        | 0.9                              | 1.2                           | 0.5                  | 0.6                  |
| 53     | 0.4                        | 0.4                              | 1.4                           | 0.0                  | 1.8                  |
| 55     | 1.5                        | 1.4                              | 1.5                           | 2.1                  | 2.4                  |
| 56     | 0.9                        | 0.9                              | 0.8                           | 1.0                  | 0.6                  |
| 57     | 3.2                        | 3.6                              | 3.5                           | 4.6                  | 0.6                  |
| 58     | 1.0                        | 1.1                              | 0.1                           | 0.5                  | 0.0                  |
| 78     | 0.1                        | 0.0                              | 0.0                           | 0.5                  | 0.0                  |

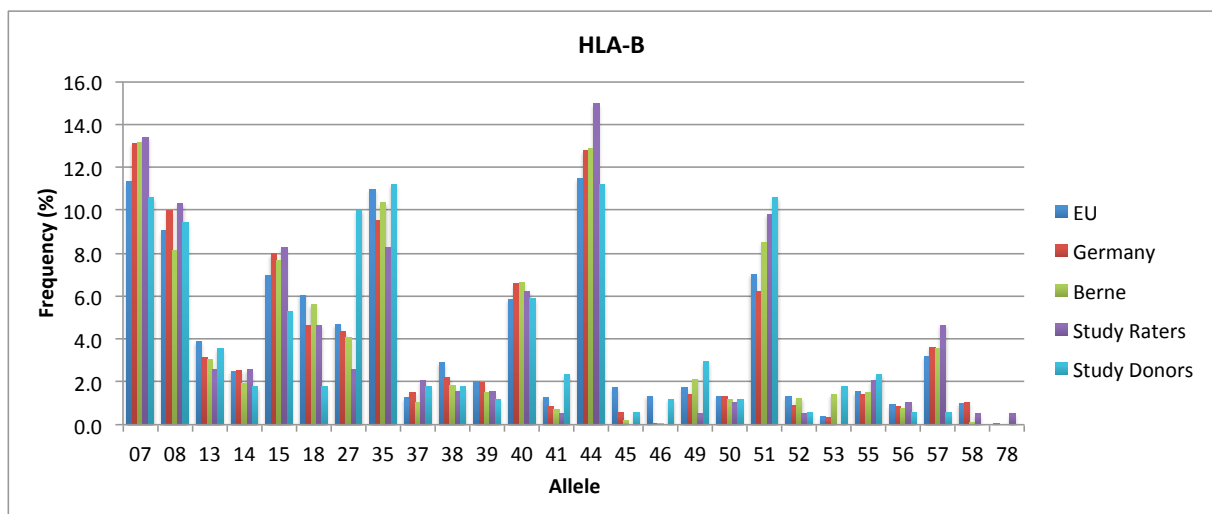

**Probst, Fischbacher, Lobmaier, Wirthmüller & Knoch: Men's preferences for women's body odours are not associated with HLA**

**HLA-C**

| Allele | EU population<br>N=106'276 | German<br>population<br>N=174 | Bern<br>population<br>N=3'545 | Study Raters<br>N=97 | Study donors<br>N=85 |
|--------|----------------------------|-------------------------------|-------------------------------|----------------------|----------------------|
| 01     | 3.9                        | 5.6                           | 3.7                           | 2.6                  | 8.8                  |
| 02     | 5.7                        | 10.3                          | 4.5                           | 4.6                  | 7.1                  |
| 03     | 11.6                       | 15.7                          | 12.3                          | 12.9                 | 12.9                 |
| 04     | 12.9                       | 9                             | 13.5                          | 11.9                 | 14.7                 |
| 05     | 5.9                        | 6.4                           | 9.1                           | 7.2                  | 5.9                  |
| 06     | 10.2                       | 6.2                           | 7.8                           | 9.8                  | 7.1                  |
| 07     | 28.9                       | 33.2                          | 29.4                          | 31.4                 | 27.1                 |
| 08     | 2.7                        | 2.1                           | 2.1                           | 2.1                  | 1.2                  |
| 12     | 8.8                        | 4.9                           | 5.5                           | 5.2                  | 2.9                  |
| 14     | 1.6                        | 0.9                           | 2.0                           | 3.1                  | 1.2                  |
| 15     | 3.4                        | 1.8                           | 5.4                           | 7.2                  | 5.3                  |
| 16     | 3.1                        | 0.6                           | 5.2                           | 1.5                  | 4.1                  |
| 17     | 1.2                        | 0.9                           | 0.6                           | 0.5                  | 1.8                  |

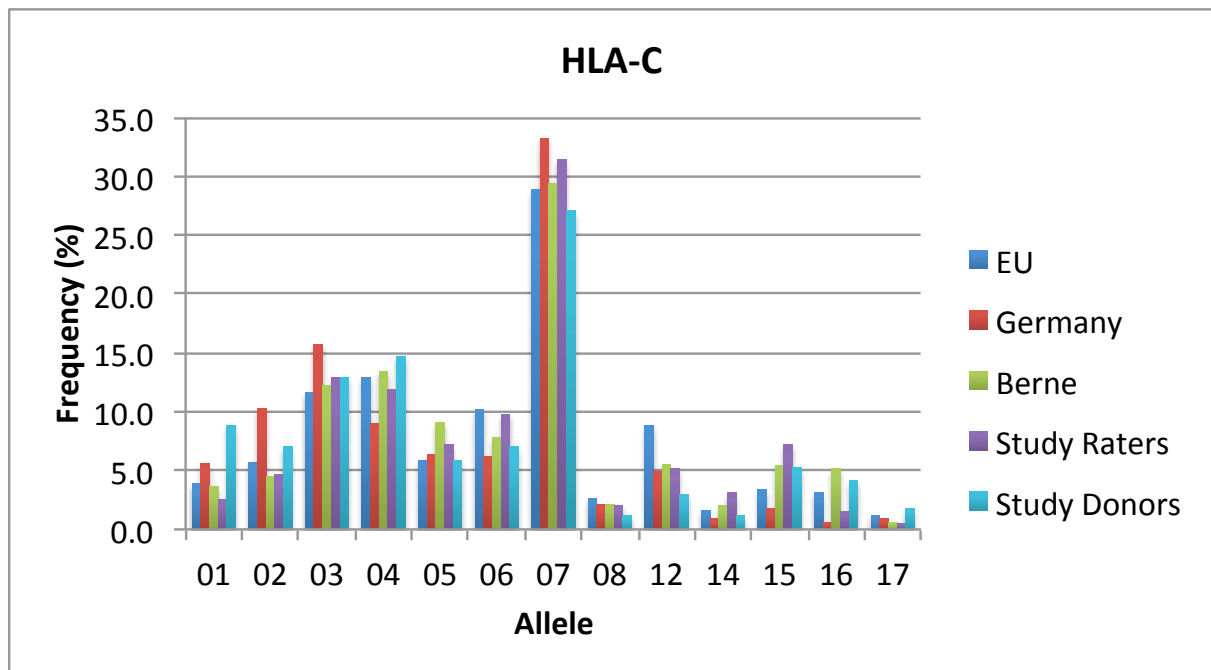

**Probst, Fischbacher, Lobmaier, Wirthmüller & Knoch: Men's preferences for women's body odours are not associated with HLA**

**HLA-DRB1**

| Allele | EU population<br>N=124'603 | German<br>population<br>N=11'407 | Bern<br>population<br>N=3'545 | Study Raters<br>N=97 | Study donors<br>N=85 |
|--------|----------------------------|----------------------------------|-------------------------------|----------------------|----------------------|
| 01     | 10.2                       | 11.1                             | 10.3                          | 8.2                  | 11.2                 |
| 03     | 10.2                       | 10.6                             | 9.7                           | 11.3                 | 10.6                 |
| 04     | 11.7                       | 13.2                             | 12.9                          | 12.9                 | 12.4                 |
| 07     | 12.6                       | 12.6                             | 13.2                          | 11.3                 | 7.1                  |
| 08     | 3.2                        | 3.3                              | 3.5                           | 4.1                  | 1.8                  |
| 10     | 1.2                        | 1.7                              | 0.7                           | 0.5                  | 2.9                  |
| 11     | 15.5                       | 12.5                             | 13.1                          | 12.4                 | 18.2                 |
| 12     | 1.9                        | 1.9                              | 1.6                           | 3.6                  | 1.2                  |
| 13     | 12.5                       | 12.9                             | 14.0                          | 13.4                 | 17.1                 |
| 14     | 3.6                        | 3.1                              | 4.0                           | 3.1                  | 4.7                  |
| 15     | 11.9                       | 14.2                             | 13.6                          | 15.5                 | 9.4                  |
| 16     | 4.3                        | 2.4                              | 2.5                           | 3.6                  | 3.5                  |

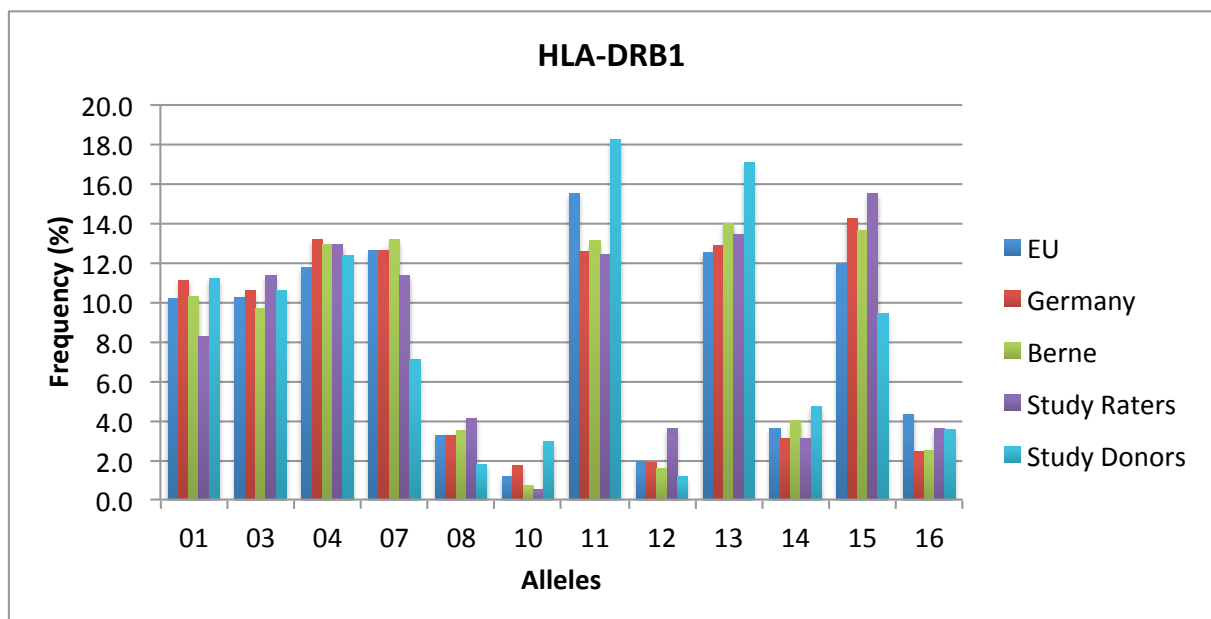

**Probst, Fischbacher, Lobmaier, Wirthmüller & Knoch: Men's preferences for women's body odours are not associated with HLA**

**HLA-DQA1**

| Allele | EU population<br>N=4'749 | German<br>population<br>N=174 | Bern<br>population N=<br>n/a | Study Raters<br>N=97 | Study donors<br>N=85 |
|--------|--------------------------|-------------------------------|------------------------------|----------------------|----------------------|
| 01     | 40.4                     | 47.7                          |                              | 43.3                 | 48.2                 |
| 02     | 12.1                     | 9.2                           |                              | 11.3                 | 7.1                  |
| 03     | 13.1                     | 13.3                          |                              | 12.9                 | 14.1                 |
| 04     | 3.2                      | 3.5                           |                              | 3.1                  | 0.0                  |
| 05     | 30.3                     | 26.2                          |                              | 27.8                 | 30.6                 |
| 06     | 0.5                      | 0.3                           |                              | 1.5                  | 0.0                  |

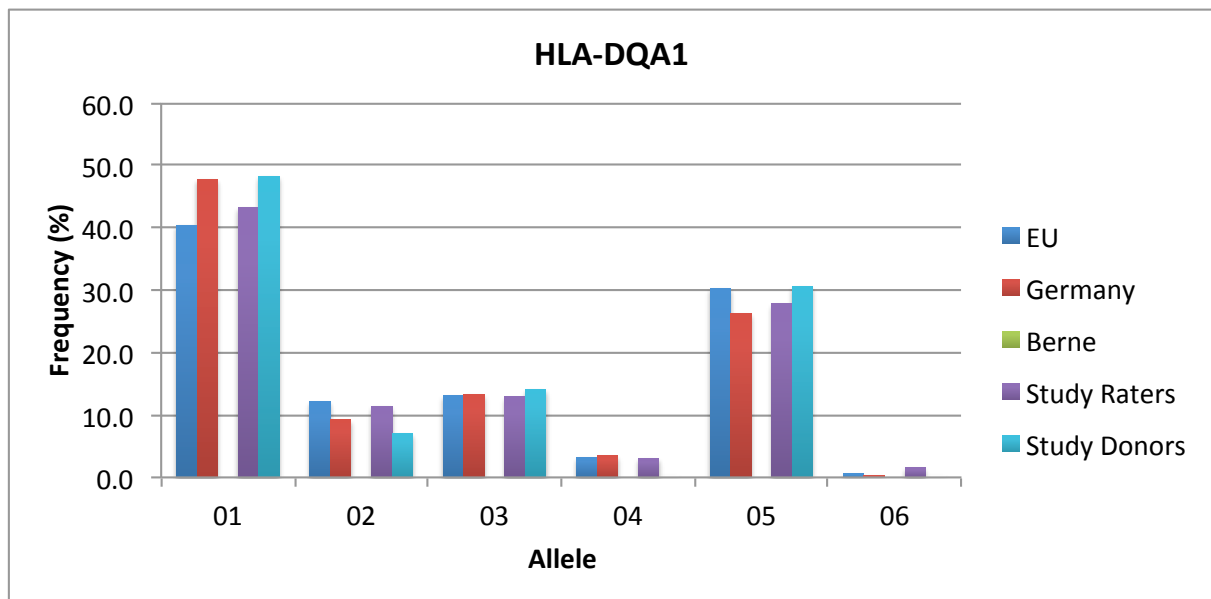

**Probst, Fischbacher, Lobmaier, Wirthmüller & Knoch: Men's preferences for women's body odours are not associated with HLA**

**HLA-DQB1**

| Allele | EU population<br>N=24'598 | German<br>population<br>N=174 | Bern<br>population<br>N= 3'545 | Study Raters<br>N=97 | Study donors<br>N=85 |
|--------|---------------------------|-------------------------------|--------------------------------|----------------------|----------------------|
| 02     | 21.3                      | 19.3                          | 19.0                           | 18.6                 | 16.5                 |
| 03     | 35.9                      | 29.4                          | 36.4                           | 35.1                 | 35.3                 |
| 04     | 2.8                       | 2.9                           | 3.6                            | 3.1                  | 0.0                  |
| 05     | 19.6                      | 19.0                          | 15.8                           | 14.4                 | 23.5                 |
| 06     | 20.0                      | 29.7                          | 25.8                           | 28.9                 | 24.7                 |

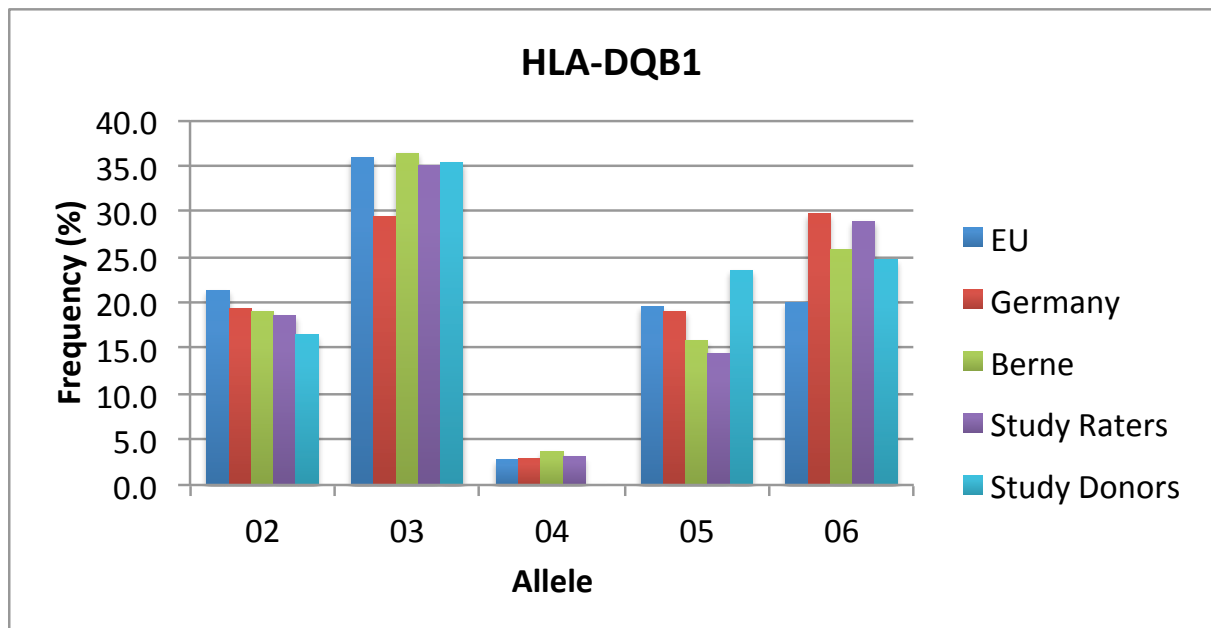

Supplement: rspb20171830supp3.pdf [file rspb20171830supp3.pdf]
