# Supplementary material
Source: PubMed Central journal article supplement (PMC5647312)
Supplement: rspb20171830supp2.pdf [file rspb20171830supp2.pdf]

## Electronic Supplementary Material 2

### Additional information regarding the pre-selection of similar and dissimilar odour pads

To test the effect of HLA-dissimilarity on attractiveness or pleasantness, we pre-selected 4 HLA-similar and 4 HLA-dissimilar body odour pads. To do so, we first calculated an HLA-Similarity-Index for each rater-donor pair. This Index was primarily based on the three most investigated loci in human studies (HLA-A, HLA-B and HLA-DRB1; Jacob, McClintock, Zelano, & Ober, 2002; Roberts, Gosling, Carter, & Petrie, 2008; Thornhill et al., 2003; Wedekind & Furi, 1997; Wedekind, Seebeck, Bettens, & Paepke, 1995) and secondarily on all loci samples (HLA-A, HLA-B, HLA-C, HLA-DRB1, HLA-DQA1, HLA-DQB1). Specifically, the HLA-Similarity-Index was computed as the total number of alleles shared across the loci. The three loci that are most commonly investigated in HLA-related odour preference research (HLA-A, HLA-B, HLA-DRB1) were considered first (technically, we multiplied similarity on these loci by 100). If they provided equal similarity, then the less well investigated loci (HLA-C, HLA-DQA1 und HLA-DQB1) were taken into account. Hence HLA-Similarity-Indices ranged from 0 (no alleles were shared between female odour donor and male rater) to 606 (all alleles were shared between female odour donor and male rater).

#### References:

- Jacob, S., McClintock, M. K., Zelano, B., & Ober, C. (2002). Paternally inherited HLA alleles are associated with women's choice of male odor. *Nature Genetics*, *30*(2), 175-179. doi:10.1038/ng830
- Karlin, S., & Piazza, A. (1981). Statistical methods for assessing linkage disequilibrium at the HLA-A, B, C loci. *Ann Hum Genet*, *45*(Pt 1), 79-94.
- Klitz, W., Maiers, M., Spellman, S., Baxter-Lowe, L. A., Schmeckpeper, B., Williams, T. M., & Fernandez-Vina, M. (2003). New HLA haplotype frequency reference standards: high-resolution and large sample typing of HLA DR-DQ haplotypes in a sample of European Americans. *Tissue Antigens*, *62*(4), 296-307.
- Roberts, S. C., Gosling, L. M., Carter, V., & Petrie, M. (2008). MHC-correlated odour preferences in humans and the use of oral contraceptives. *Proceedings of the Royal Society B-Biological Sciences*, *275*(1652), 2715-2722. doi:10.1098/rspb.2008.0825
- Thornhill, R., Gangestad, S. W., Miller, R., Scheyd, G., McCollough, J. K., & Franklin, M. (2003). Major histocompatibility complex genes, symmetry, and body scent attractiveness in men and women. *Behavioral Ecology*, *14*(5), 668-678. doi:10.1093/beheco/arg043
- Wedekind, C., & Furi, S. (1997). Body odour preferences in men and women: do they aim for specific MHC combinations or simply heterozygosity? *Proceedings of the Royal Society B-Biological Sciences*, *264*(1387), 1471-1479.
- Wedekind, C., Seebeck, T., Bettens, F., & Paepke, A. J. (1995). MHC-dependent mate preferences in humans. *Proceedings of the Royal Society B-Biological Sciences*, *260*(1359), 245-249. doi:10.1098/rspb.1995.0087
