# Supplementary material
Source: PubMed Central journal article supplement (PMC5647312)

Electronic Supplementary Material 4

**A) Relation between attractiveness, pleasantness and intensity ratings and the rareness of HLA alleles**

Table 1: bivariate correlations between 3 mean odour ratings and frequency of HLA-alleles (N = 42)

| Measure                                  | 1       | 2       | 3    | 4      |
|------------------------------------------|---------|---------|------|--------|
| 1. Rating: Attractiveness                |         |         |      |        |
| 2. Rating: Pleasantness                  | .97***  |         |      |        |
| 3. Rating: Intensity                     | -.75*** | -.77*** |      |        |
| 4. HLA-Frequency: over all HLA-loci      | .06     | .06     | .13  |        |
| 5. HLA-Frequency: HLA-A; HLA-B; HLA-DRB1 | .09     | .10     | -.01 | .60*** |

\* $p < 0.5$ , \*\* $p < 0.1$ , \*\*\* $p < 0.001$

**B) Figure S2: Results of the pleasantness ratings**

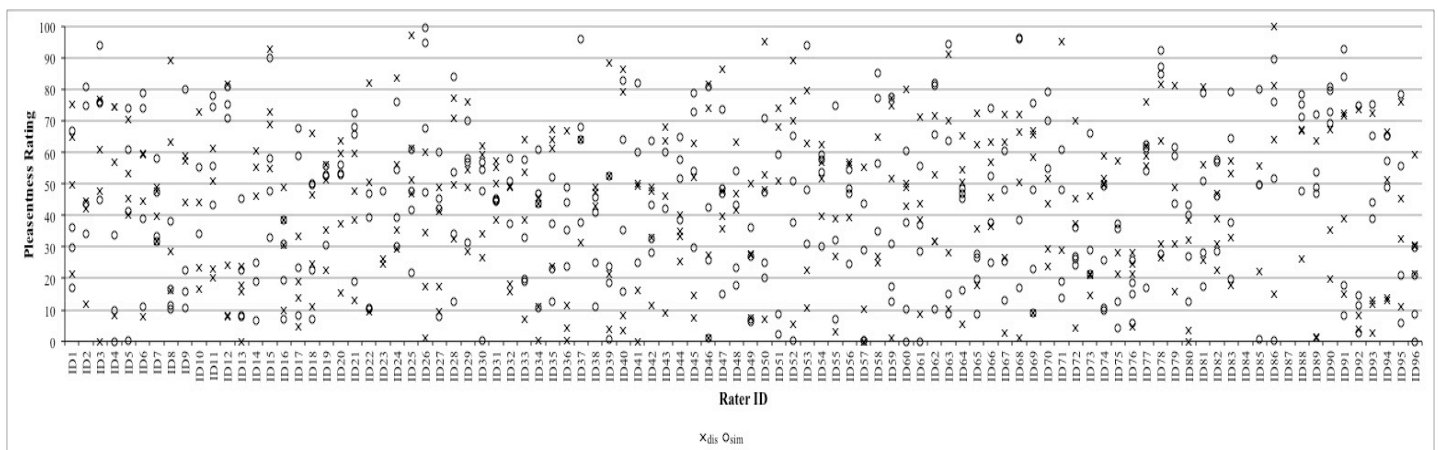

Supplement: rspb20171830supp4.pdf [file rspb20171830supp4.pdf]
